# Supplementary material for: Non-muscle myosins control radial glial basal endfeet to mediate interneuron organization
Source: PLoS Biol. 2023 Feb 28;21(2):e3001926. doi: 10.1371/journal.pbio.3001926 (PMC9974137; doi:10.1371/journal.pbio.3001926)
Supplement: S2 Data — (XLSX) [file pbio.3001926.s015.xlsx]

## Sheet: Fig 4D
Fig 4D. Cortical Thickness Quantification	Ctrl	cHet	cKO
	554.461	595.242	542.09
	504.969	642.966	647.526
	488.598	576.907	585.067
	590.806	574.78	529.448
	694.664		563.949
	511.214		421.509
	559.1		353.512
	525.787

## Sheet: Fig 4E
Fig 4E. Sox2 Thickness Quantification	Ctrl	Myh9 cHet	Myh9 cKO
	106.813	104.083	116.762
	86.3777	114.043	107.716
	99.062	118.952	107.489
	115.457	135.41	90.4637
	109.707		113.16
	114.767		122.697
	129.511
	115.889

## Sheet: Fig 4F
Fig 4F Sox2 density quantification	Ctrl	Myh9 cHet	Myh9 cKO
	0.405319	0.436979	0.283459
	0.356385	0.229473	0.290014
	0.259852		0.209124
	0.298419		0.270018
	0.247781

## Sheet: Fig 4I
Fig 4I Branches per cell	Ctrl	Myh9 cKO
	6	7
	6	3
	8	5
	3	2
	9	1
	3	10
	9	4
	13	2
	6	8
	6	4
	4	5
	5	2
	10	4
	9	10
	8	1
	7	2
	4	1
	1	2
	6	2
	8	7
	6	2
	8	2
	4	4
	6	2
	4	2
	8	9
	6	4
	6	1
	4	6
	8	6
	4	2
	4	3
	8	6
	8	4
	5
	7
	8
	13
	6
	1
	6
	8
	10
	12
	2
	4
	4
	8
	8
	4
	6
	6
	8
	1
	10
	9
	4
	12
	8
	4
	6
	2
	4
	2
	4

## Sheet: Fig 4J
Fig 4J Branch Order	Ctrl
1st	2	2	2	3	2	2	3	2	2	2	2	3	2	2	2	2	4	1	2	2	2	2	2	2	2	2	2	2	2	2	2	2	2	2	3	3	2	2	2	1	2	2	2	2	2	2	2	2	2
2nd	2	2	2	0	4	1	4	3	2	4	2	2	4	2	4	2	0	0	2	2	4	4	2	4	2	2	2	2	2	2	2	2	4	4	2	2	2	2	2	0	4	4	4	2	0	2	2	2	4
3rd	2	2	4	0	3	0	2	2	2	0	0	0	2	3	2	3	0	0	2	2	0	2	0	0	0	2	2	2	0	2	0	0	2	2	0	2	4	3	2	0	0	2	4	4	0	0	0	4	2
4th	0	0	0	0	0	0	0	4	0	0	0	0	2	2	0	0	0	0	0	2	0	0	0	0	0	2	0	0	0	2	0	0	0	0	0	0	0	4	0	0	0	0	0	4	0	0	0	0	0
5th	0	0	0	0	0	0	0	2	0	0	0	0	0	0	0	0	0	0	0	0	0	0	0	0	0	0	0	0	0	0	0	0	0	0	0	0	0	2	0	0	0	0	0	0	0	0	0	0	0
6th	0	0	0	0	0	0	0	0	0	0	0	0	0	0	0	0	0	0	0	0	0	0	0	0	0	0	0	0	0	0	0	0	0	0	0	0	0	0	0	0	0	0	0	0	0	0	0	0	0
[truncated: 50 more columns]

## Sheet: Fig 4K
Fig 4K Endfeet per cell	Ctrl	Myh9 cKO
	4	3
	2	2
	3	2
	2	1
	3	1
	2	2
	4	2
	5	2
	2	2
	2	2
	2	1
	2	0
	2	2
	2	3
	4	1
	3	2
	4	1
	1	1
	3	2
	2	2
	4	1
	5	1
	2	1
	3	2
	2	1
	4	2
	2	2
	3	1
	3	2
	3	1
	3	1
	3	1
	1	3
	4	1
	2
	2
	3
	2
	2
	1
	4
	3
	4
	4
	2
	2
	3
	4
	3
	2
	4
	2
	3
	1
	4
	4
	1
	1
	3
	1
	1
	2
	1
	0
	2

## Sheet: Fig 4L
Fig 4L Endfoot distribution
	Attached
Ctrl	100	100	100	0	33.33	50	50	80	100	50	100	100	0	0	75	0	100	0	66.67	100	100	60	100	100	100	100	100	66.67	33.33	66.67	100	100	100	75	50	50	100	100	0	100	75	66.67	50	75	100	100	100	75	100
cKO Myh9	100	50	100	0	0	50	0	50	0	0	100	50	0	0	0	100	0	0	0	100	0	0	0	0	50	100	100	50	100	100	0	100	0
[truncated: 143 more columns]
